# Supplementary material
Source: PubMed Central journal article supplement (PMC4297732)
Supplement: NIHMS645847-supplement-2.pdf [file NIHMS645847-supplement-2.pdf]

## Video Legends

**Video 1. CD40L-treated DC1 express TNT-like protrusions that establish multiple connections between neighboring cells.** DC1 were treated with rhCD40L for 20 h prior to staining for cell surface MHC class I (green) and nuclei (blue), followed by confocal imaging. The rotating volume view video displaying 12.5 frames per second (FPS) was generated from a representative Z plane reconstruction image, which highlights numerous TNT-like extensions that formed simultaneous intercellular connections on or above the substratum. Related to Figure 1.

**Video 2. CD40L-treated DC2 typically display membrane ruffling, but fail to form TNTs.** PGE<sub>2</sub>-polarized DC2 were stained for cell surface MHC class I (green) and nuclei (blue), and confocal images collected 20 h post-addition of rhCD40L. A rotating volume view video (12.5 FPS) was generated from a representative Z plane reconstruction image, emphasizing the rounded cell morphology, typical membrane ruffling, and absence of TNT-like membrane extensions. Related to Figure 1.

**Video 3. Live-cell imaging captures the dynamic CD40L-induced reticulation process in DC1.** DC1 were hyper-stimulated with rhCD40L for 4 h prior to high resolution time-lapse DIC imaging for a duration of 3.6 hours to capture the reticulation process, whereby DC1 membrane extensions formed a dynamic and increasingly complex network between proximal and remote cells. The video is comprised of 36 total frames, which were collected every 6 min and displayed at 5.1 FPS. Related to Figure 4.

**Video 4. TNTs support direct intercellular vesicle transfer between CD40L-activated DC1.** Mature DC1 were hyper-stimulated with rhCD40L for a duration of 8 h, and subsequently analyzed using live-cell DIC microscopy. A representative 2.5 h time-lapse video reveals multiple endogenous vesicles exiting one cell body into a TNT-like membrane bridge formed between 2 adjacent cells, followed by vesicles trafficking through the tube, and finally entering the connected cell body. The video is composed of 75 total frames collected every 2 min and displayed at 7.5 FPS. Related to Figure 4.

**Video 5. Exogenous beads representing Ag rapidly traverse TNTs of donor DC1.** Donor DC1 (blue) containing fluorescently labeled 40 nm latex beads (green) were co-cultured with recipient DC1 (red) for 20 h in the presence of rhCD40L prior to live-cell confocal imaging. The video captures the interaction between donor and recipient DC membrane extensions and multiple beads rapidly traversing a dynamic TNT-like structure (blue) expressed by a donor DC1 over a duration of 28 min. Video is comprised of 46 total frames collected every 37 s and displayed at 11.5 FPS. Related to Figure 5.

**Video 6. Bacterial pathogens can traffic between DC1 along CD40L-induced TNTs.** Labeled DC1 monolayers (blue) stimulated with rhCD40L for 10 h were subsequently exposed to EGFP-expressing *Escherichia coli* for 2 h prior to microscopy. Time-lapse confocal resonant scanning methods were used to capture the bi-directional trafficking of individual bacterium between interconnected DC1 along a membrane bridge (arrows) for a duration of 34 min. Video is made up of 103 total frames collected every 20 s and shown at 14.7 FPS. Related to Figure 6.
